1 **First data-driven approach to using individual cattle weights to estimate mean adult**  
2 **dairy cattle weight in the UK**

3 **Hannah E. Schubert<sup>1\*</sup>, Sarah Wood<sup>1</sup>, Kristen K. Reyher<sup>1</sup>, Harriet L. Mills<sup>1,2</sup>**

4 1. Bristol Veterinary School, University of Bristol, Langford House, Langford, Bristol, BS40  
5 5DU, UK

6 2. MRC Integrative Epidemiology Unit, Bristol Medical School, University of Bristol,  
7 Oakfield House, Oakfield Road, Bristol, BS8 2BN, UK

8 \*corresponding author, [hannah.schubert@bristol.ac.uk](mailto:hannah.schubert@bristol.ac.uk)

9 ABSTRACT

10 **Introduction:** Knowledge of accurate weights of cattle is crucial for effective dosing of  
11 individual animals with medicine and for reporting antimicrobial usage metrics, amongst  
12 other uses. The most common weight for dairy cattle presented in current literature is 600 kg,  
13 but this is not evidenced by data. For the first time, we provide an evidence-based estimate of  
14 the average weight of UK dairy cattle to better inform decisions by farmers, veterinarians and  
15 the scientific community.

16 **Methods:** We collected data for 2,747 dairy cattle from 20 farms in the UK, 19 using Lely  
17 Automatic Milking Systems with weigh floors and 1 using a crush with weigh scales. These  
18 data covered farms with different breed types, including Holstein, Friesian, Holstein-Friesian  
19 and Jersey, as well as farms with dual purpose breeds and cross-breeds. Data were used to  
20 calculate a mean weight for dairy cattle by breed, and a UK-specific mean weight was  
21 generated by scaling to UK-specific breed proportions. Trends in weight by lactation number,  
22 DIM and production level were also explored using individual cattle-level data.

23 **Results:** Mean weight for adult dairy cattle included in this study was 617 kg (standard  
24 deviation (sd) 85.6 kg). Mean weight varied across breeds, with a range of 466 kg (sd=56.0  
25 kg, Jersey) to 636 kg (sd=84.1, Holsteins). When scaled to UK breed proportions, the

26 estimated mean UK dairy cattle weight was 620 kg. Overall, first-lactation heifers weighed  
27 9% less than cows. Mean weight declined for the first 30 days post-calving, before steadily  
28 increasing. For cattle at peak production, mean weight increased with production level.

29 **Conclusions:** This study is the first to calculate a mean weight of adult dairy cattle in the UK  
30 based on on-farm data. Overall mean weight was higher than that most often proposed in the  
31 literature (600 kg). Evidence-informed weights are crucial as the UK works to better monitor  
32 and report metrics to monitor antimicrobial use and are useful to farmers and veterinarians to  
33 inform dosing decisions.

34

35 **Keywords:** Dairy cattle, weight, automatic milking systems, antimicrobial usage, medicine  
36 dosing

37

38

39

## INTRODUCTION

40 Average weights of dairy cattle in the UK are not well defined. Scientific papers,  
41 reports and guidelines present a wide range of adult dairy cattle weights. A literature review  
42 demonstrated a range from 425 kg (EU estimated “average weight at time of treatment”  
43 (European Surveillance of Veterinary Antimicrobial Consumption)) to 680 kg (USA) (Pol  
44 and Ruegg, 2007) (Table 1). Additionally, the weights used in current literature are  
45 commonly either “estimated”, without clear evidence, or cited from another source (usually  
46 equally lacking in evidence). Average cattle weight would also be expected to vary with  
47 breed (DairyCo, 2005) and between populations (Collineau et al., 2017) (e.g. countries, due  
48 to different compositions of herds nationally), but this is rarely accounted for in the literature.

49

50 <Table 1 here (landscape)>

51

52 Many medicine doses should be calibrated to the estimated weight of the cattle being  
53 treated. Using incorrect weights may lead to incorrect dosing, which could prove ineffective  
54 or potentially dangerous. This is particularly true of antimicrobials where an underdose could  
55 fail to completely clear the infection, a problem which has been linked to the risk of  
56 resistance developing (Roberts et al., 2008). Additionally, metrics for reporting antimicrobial  
57 use (AMU, for example mg/kg or daily dose metrics, (Mills et al., 2017)) commonly require  
58 the total weight of the animals at risk of treatment to be included in the calculation, giving a  
59 measure which accounts for the total kg. If the included weight is too high or too low this  
60 could lead to the metric under- or over-representing the actual use of the antimicrobials and  
61 confound comparison across farms or countries.

62 For the purpose of treating cattle with the appropriate dose of medicine, visually  
63 estimated weight is usually relied upon. However, it has previously been shown that visual

64 estimates of cattle weights vary in accuracy compared with estimates from heart girth tape  
65 measurements, with under- and overestimation at the extremes of the weight scale (Wood et  
66 al., 2015). Visual estimates may also be influenced by expectations of weight, which can also  
67 vary widely. For example, we asked 15 farm vets in practices across South West England to  
68 estimate the average weight of a UK ‘Holstein-Friesian milking cow’, resulting in a range of  
69 525-775 kg and a mean of 678 kg.

70         Additionally, weight estimates based on body measurements of cattle (e.g. Schaeffer’s  
71 formula (Sastry et al., 1983)) or use of weigh tapes (Heinrichs et al., 2007) have been shown  
72 to deviate from true weights (Wangchuk et al., 2017). More accurate measures can be  
73 obtained from scales such as weigh crushes or weigh floors.

74         Some Automatic Milking Systems (AMS) have a weigh floor that records cattle  
75 weight at every milking (e.g. Lely, <https://www.lely.com/gb/>). These are predominantly used  
76 to monitor changes in weight and draw the stockperson’s attention to abnormal losses or  
77 gains (for example, Lely suggest a daily weight loss of 0.8% would require attention (**Lely**)).  
78 These weigh floors have been used in previous studies to monitor cattle weight change over  
79 time (van der Tol and van der Kamp, 2010, Podlahová et al., 2011). They are precisely  
80 calibrated at installation, and are cleaned and set to zero at every service (approximately 7  
81 times over every 2-year period). Equipment is also widely available for weighing cattle  
82 through a handling crush.

83         In order to determine mean UK adult dairy cattle weights for use by farmers,  
84 veterinarians and the scientific community, we used data collected from 20 UK farms (19  
85 from farms using Lely AMS and 1 farm using a crush with weigh scales). We also used these  
86 data to establish mean breed weights and to explore trends in weight by lactation number,  
87 DIM and overall milk production.

88

89

## MATERIALS AND METHODS

### 90 *Data collection*

91 We collected data from 20 UK farms: 19 of these farms used Lely AMS and were  
92 recruited through Lely - 10 from Cornwall and Devon, 6 from Somerset and 3 from different  
93 areas of the UK. Lely emailed the farms from Devon, Cornwall and Somerset asking farmers  
94 to give permission to Lely to access the farm's AMS data for a single day (See Appendix 1).  
95 Data from the other 3 farms came from another study to which Lely had contributed. Farmers  
96 were asked to calibrate the AMS weigh floor scales ("calibrate" being the term used by Lely  
97 to describe the following: clean scales and remove any trapped stones, then select "tare scale"  
98 on the control screen) and contact Lely to let them know this had been done (by text  
99 message). Lely then remotely downloaded a report from the farm's AMS. The 20th farm was  
100 recruited directly and cattle were weighed using a crush with a weigh bar and digital scales.  
101 This farm in Devon with a Jersey herd was included, despite the different weighing method,  
102 for maximum representation across breeds. All cattle from the milking herd were weighed.  
103 An operator whose weight was known stood on the scales prior to use to check for accuracy,  
104 and the scales were set to zero between cattle if necessary.

105 Datasets from Lely were fully anonymised before we received them and contained the  
106 following relevant variables: *Animal Number, Robot, Date Time, Lactation No., Lactation*  
107 *days, Weight at Calving, Weight, Weight Avg., Weight Avg. Dev. and Day Production*. The  
108 variable "Weight" was the weight at last milking and "Weight Avg." was the mean weight for  
109 that animal over the last 3 milkings (from the current lactation). "Weight at Calving" was the  
110 very first weight recorded after calving for the current lactation. "Weight Avg." was used for  
111 all calculations. The dataset acquired using a crush was anonymised at animal level and  
112 contained the following variables: *Animal Number, Date, Lactation No., Lactation days and*  
113 *Weight*.

114 Breeds were assigned at the farm level by the farmer (Holstein = 7 farms, Friesian = 2  
115 farms, Holstein-Friesian = 8 farms, Jersey = 1 farm, Cross-breed = 1 farm, Other breed = 1  
116 farm; Table S1). All farms were all-year round calving which meant a full range of lactation  
117 stages were included.

### 118 *Data cleaning*

119 Farm datasets from Lely contained data for all milking cattle registered to that farm at  
120 the time the report was taken. This included the last weight and production measurements for  
121 cattle that had not been milked recently. Cattle not weighed recently were likely to be dry,  
122 therefore the measurement was likely to be from the end of their previous lactation; including  
123 these would have caused an over-representation of late lactation cattle. Additionally, extreme  
124 dates may have indicated that the electronic collars used by the AMS for identification may  
125 have been broken, or that the system was not updated to indicate that an animal was removed  
126 from the herd. Therefore, for each farm, we used only data from the date with the most cattle  
127 milked/measured and the immediate week preceding (Table S1). Entries with missing weight  
128 or missing date were also removed; only 1 entry per animal was kept.

129 At the Jersey farm, data was excluded if the scales were not set to zero in between  
130 cattle.

### 131 *Representativity of data*

132 To check that the cattle used in this study were representative of the UK herd, we  
133 obtained data on the proportion of heifers, mean lactation number and mean herd size. These  
134 data came from all UK herds that milk record with National Milk Records (NMR). The  
135 proportion of heifers in the NMR data was compared to our sample using a chi-square test for  
136 equal proportions. As the herds included in our dataset will be included in the herds provided

137 by NMR, only simple comparisons were possible for mean lactation number and mean dairy  
138 herd size (a t-test would have required distinct subsets).

### 139 *Data analysis*

140 We calculated the distribution and descriptive statistics for mean weights of cattle for  
141 the following breed categories: Holstein, Friesian, Holstein-Friesian, Cross-breed, Jersey,  
142 Other breed. Weights were calculated overall (for all cattle) and split into first lactation only  
143 (heifers) and second lactation onwards (cows). Overall mean weights and heifer and cow  
144 weights were compared across breeds using t-tests. Mean weights of heifers and cows for  
145 each breed and for the dataset as a whole were also compared using t-tests.

146 Additionally, the mean weight for cattle in each day of lactation (overall, and split  
147 into heifers and cows) was calculated and plotted to identify any trends over lactation. The  
148 correlation between mean weight and daily milk production was calculated. As milk  
149 production is known to vary across lactation, this analysis was repeated with only cattle  
150 considered to be in peak production (20-60 days into lactation).

151 Data analysis and graphics were generated using the statistical computing package R  
152 (<https://www.r-project.org/>).

### 153 *Estimated average weight for the UK*

154 By comparing the proportion of each breed within our dataset to the proportion in the  
155 UK population (using data provided by the British Cattle Movement Service (BCMS), Table  
156 S3), we calculated an estimated average adult dairy cattle weight for the UK. Breeds reported  
157 by BCMS were grouped into categories (Table S3 & S4) aligned with the breeds for our data.  
158 To estimate a UK national average weight, mean weights by breed category calculated from  
159 our data were scaled according to the representation of that category within BCMS data.

160 *Calibration checks*

161 For each farm using Lely AMS, we calculated the distribution of weights for each of  
162 the farm's individual AMS units and checked for any which showed unexpected deviation  
163 from the overall mean for that farm and breed using t-tests. Additionally, we collected 6 days  
164 of weight data directly from the farmer from the largest farm (with the highest number of  
165 AMS units) over a 1-week period. These data were used to check the calibration accuracy of  
166 the individual weigh floors by comparing the mean and distribution of weights each day  
167 using t-tests.

168

169 RESULTS

170 *Data description*

171 The original datasets included 3,106 cattle; after cleaning, 2,747 cattle remained (i.e.  
172 11.5% of cattle were excluded due to dates outside of range, missing date or weight  
173 information or our inability to obtain an accurate weight). Table 2 presents summary statistics  
174 for the cattle included in the study. Just under a third of cattle were in their first lactation. On  
175 the date of sampling, mean production was 33 L (Table 2).

176

177 <Table 2 here>

178

179 *Representativity of data*

180 Data provided by NMR on all dairy cattle in UK herds indicated that the mean  
181 proportion of heifers within a herd nationally was 29.1% (95% CI [29.0%, 29.2%]),  
182 compared to 31.2% (95% CI [29.5 %, 33.0 %]) within our dataset (Table 2). The mean



183 lactation number within herds nationally was 2.8, compared to 2.7 within our dataset (Table  
184 2). The mean number of cows in milk nationally was 155, compared to 155 within our dataset  
185 (Table 2).

### 186 *Data analysis*

187 The cattle within this dataset had an overall mean weight of 617.3 kg (standard  
188 deviation 85.6 kg, median 620 kg) across all breeds and including both heifers and cows  
189 (Table 3). Heifers were on average 9.0% lighter than cows (Figure 1A) with mean weight  
190 578.0 kg for heifers and 635.2 kg for cows (t-test:  $p < 0.05$ ). Jersey cattle were 25.8% lighter  
191 than the overall mean weight for all other breeds (465.7 kg compared to 627.3 kg).

192

193 <Figure 1 here>

194

### 195 *Effect of breed, lactation number, DIM and production*

196 Some variations in overall mean weight across breeds was seen within the dataset  
197 (Table 3, Figure 1B, Figure S1). Of the named breeds, Holstein were the heaviest (636.1 kg)  
198 and Jersey the lightest (465.7 kg). Cattle categorised as “Other” were heavier than all breeds  
199 (662.8 kg,  $p < 0.01$ , Table S2).

200 The proportion of heifers varied between breeds in this dataset. For example, just over  
201 10% of Friesians were heifers, whereas almost 40% of Holsteins were heifers (Figure S2).  
202 This is likely to skew the means; indeed, the variation between mean weight of Holstein and  
203 Friesian cows was far greater, whereas there was almost no difference between the heifer  
204 means for these breeds (Figure 1B, Table S2).

205

206 <Table 3 here>

207

208           There was no correlation between weight and milk production for the 19 Lely farms  
209 (production data was unavailable for the Jersey farm) using all cattle (Figure 1C). However,  
210 when including only cattle at peak production (days 20-60), cattle with greater production  
211 were heavier (Figure 1D).

212           Mean weight declined for the first thirty days post-calving and was then seen to rise  
213 steadily for the remainder of the lactation (Figure 1E). Heifers had a consistently lower  
214 weight across lactation than cows.

### 215 *Estimated average weight for the UK*

216           Taking the mean weights for different breeds in our dataset (Table 3) and the  
217 distribution of these breeds within the UK dairy population (Table S5), we calculated a UK  
218 average weight of 619.6 kg.

### 219 *Calibration checks*

220           No substantial differences in the mean weight between robots on farms (and hence by  
221 breed) were found once proportions of heifers and cows milked by that robot on the day of  
222 data collection were accounted for (data not shown to preserve anonymity).

223           There was little variation in the mean weight for the 6 days of data collected from the  
224 single large farm (Figure S3). None of the daily distributions were significantly different  
225 from each other ( $p > 0.7$ ) indicating that the calibration of robots was likely to be accurate;  
226 significant deviations in weighings from a single robot would affect the distribution and mean  
227 weight for that day and would be detected by t-tests (as well as being flagged by the system  
228 on farm).

## 229 DISCUSSION

230           The overall mean weight for all 2,747 dairy cattle was 617.3 kg. Scaling by UK breed  
231 proportions gave an estimated average weight for adult UK dairy cattle of 619.6 kg. We

232 therefore suggest a national-level weight of 620 kg to be used for AMU calculations, with  
233 farm-level weights to be estimated based on the breed mix on the farm. The most commonly  
234 assumed dairy cattle weight in the literature was 600 kg. With our data, we suggest that 600  
235 kg is likely to be an underestimation of mean adult dairy cattle weight in the UK.

236         There was some variation in weight distribution across all breeds included in this  
237 study, ranging from 465.7 kg (Jersey) to 636 kg (Holstein). Jersey cattle were 25.8% lighter  
238 than the mean across other breeds. Heifers were on average 9.0% lighter than cows. Cattle  
239 categorised as “Other” were heavier than all breeds (662.8 kg,  $p < 0.01$ , Table S2), however  
240 the dataset contained a very low number in this category ( $n=52$ , all from 1 farm) and they  
241 were predominantly dual-purpose breeds which would be expected to be heavier. The  
242 variation between breeds is confounded by differences in the proportions of heifers and cows  
243 in each breed. For example, when heifers were removed, the difference in weight between  
244 Holstein and Friesian cows widened, though heifers in both breeds had very similar weights.  
245 It is possible that Holstein farms may have a tendency to calve heifers at a younger age than  
246 Friesian farms. We note that breeds were assigned at the farm level, so it is possible that there  
247 was within-farm variation for which we could not account.

248         Though our sample has a slightly higher proportion of heifers than the NMR data  
249 (31.2% compared to 29.1%), as the NMR data could not be split by breed we were unable to  
250 use both breed and heifer or cow status accurately in the UK average weight calculation. As  
251 heifers weigh less than cows according to our data, this could mean we underestimate the UK  
252 average weight.

253         These data show a decline in mean weight from calving to 30 DIM, and then a steady  
254 increase throughout the rest of lactation. These results support trends reported in the literature  
255 for both body weight and body condition scores (Dillon et al., 2003, Poncheki et al., 2015).

256 This trend is consistent with the expected period of negative energy balance and the  
257 mobilisation of body fat a dairy cow is likely to experience following calving (Eddy, 1992).

258 Cattle in peak production showed a strong correlation between weight and daily milk  
259 production. This may be explained by breed and parity differences: for example, heifers are  
260 likely to weigh less and produce less milk than cows, and Holsteins are likely to be higher  
261 producers (Holstein UK) and are the heaviest type of named breeds represented in this  
262 dataset.

263 If farms using Lely AMS differed from the average dairy farm, this could create a  
264 selection bias. However, the Lely AMS farms used demonstrated a wide variety of  
265 management practices and type of cow. The Lely farm animal support advisors were  
266 confident that the majority of AMS farms used a 'standard' type of dairy cattle, and also  
267 stated that many of the farms are flying herds and buying in 'standard black and white' cattle  
268 as replacements from UK markets. Though there are Jersey farms using Lely AMS which  
269 were asked for data, these farms did not record weights. 2.2% of UK cattle are Jersey cattle,  
270 which are smaller and lighter than the rest of the UK national herd hence it was important to  
271 represent them accurately. This was only possible using an alternative, non-Lely AMS farm,  
272 which was weighing cattle using a weigh crush.

273 All but 3 of the farms used were based in South West England. No data were found to  
274 indicate any geographical variation in dairy farming in the UK that would affect our  
275 conclusions.

276 As discussed, Lely robots are calibrated precisely at installation only but are regularly  
277 serviced and farmers are advised to regularly clean and tare the weigh floor. This regular  
278 cleaning by Lely and the farmer should ensure inaccuracies are minimal. During data  
279 collection for this project, farmers were asked to calibrate the scales. The normal distribution  
280 of the data indicates that there were no major inaccuracies unless identical inaccuracies were

281 occurring on every farm in the dataset, which seems unlikely. Indeed, data obtained over a  
282 week from a single farm showed no significant difference in mean weight between days.

283

284 <Figure 2 here>

285

286 This study is the first to estimate a mean weight of UK dairy cattle based on data.

287 Weights from 2,747 cattle from the 4 main named breeds, as well as cross-breeds and less  
288 common breeds were considered. These data provide valuable evidence to support 620 kg as  
289 an appropriate average weight of UK adult dairy cattle. The impact of having an evidence-  
290 based figure for the average weight, as well as variation by breed, production level and days  
291 in milk will be marked. For example, for dosing, visual weight estimation of individual cattle  
292 will be easier and more accurate if an actual average is known in the first instance (Figure  
293 2A). Also, for farm-level and national-level antimicrobial use reporting, our recommended  
294 UK weight of 620 kg will be invaluable, as using too high or too low a weight can  
295 significantly impact calculations of antimicrobial use (Figure 2B).

296

## 297 ACKNOWLEDGEMENTS

298 The authors would like to thank Wendy Ward-van Winden, Farm Management Support  
299 Advisor at Lely Center, Holsworthy for her help in obtaining data and providing additional  
300 information relating to Automatic Milking Systems. Thanks also to Jon Eldridge, Farm  
301 Management Support at Lely Center, Yeovil and Bas van Senten, Farm Management support  
302 manager, UK and Ireland for their help in obtaining data. Thanks also go to all farmers who  
303 contributed data to the study, in particular Matthew Davey who provided additional data and  
304 answered many questions. We thank Fraser Broadfoot of the Veterinary Medicines  
305 Directorate for providing data on cattle breeds in the UK. Thanks also to the Farm Animal

306 Group at Bristol Veterinary School for their comments on early drafts of this work, and to  
307 Emma Wright for assisting with data collection. Thanks to Kiera Schubert of Torch Farm  
308 Vets for comments on the final draft. Finally, we thank Seamus Gilheany, NMR Software  
309 Development at National Milk Records for providing data on some basic statistics of a  
310 sample of the UK national dairy herd.

### 311 Funding

312 H.S. is supported through the One Health Selection and Transmission of Antimicrobial  
313 Resistance (OH-STAR) project, which is also funded by the Antimicrobial Resistance Cross-  
314 Council Initiative supported by the seven United Kingdom research councils (grant number  
315 NE/N01961X/1). H.L.M. is supported through BristolBridge, an Antimicrobial Resistance  
316 Cross-Council Initiative supported by the seven United Kingdom research councils: Bridging  
317 the Gaps between the Engineering and Physical Sciences and Antimicrobial Resistance (grant  
318 number EP/M027546/1).

319

321 **Table 1.** Cattle weights as presented in recent literature. This list is not the result of a systematic literature search but does reflect the most  
 322 commonly used and cited weights. Note that the majority of these have been defined for measuring antimicrobial usage  
 323

| Reference                                                                                                                               | Weights (kg)   |                                   |                                     |                                               |                         |                                  | Comments                                                                                                                                                                                                                                                                    |
|-----------------------------------------------------------------------------------------------------------------------------------------|----------------|-----------------------------------|-------------------------------------|-----------------------------------------------|-------------------------|----------------------------------|-----------------------------------------------------------------------------------------------------------------------------------------------------------------------------------------------------------------------------------------------------------------------------|
|                                                                                                                                         | Milking<br>cow | Dairy<br>heifers<br>>24<br>months | Dairy<br>heifers<br>12-24<br>months | Dairy<br>heifers<br>weaning<br>- 12<br>months | Pre<br>weaned<br>calves | Other                            |                                                                                                                                                                                                                                                                             |
| (Montforts, 2006)                                                                                                                       | 425            |                                   |                                     | 200                                           | 200                     |                                  | Not justified with a reference or data.                                                                                                                                                                                                                                     |
| Methodology for<br>Determining Antibiotic<br>Use (European<br>Surveillance of<br>Veterinary<br>Antimicrobial<br>Consumption)<br>(ESVAC) | 425            | 425                               | 200                                 | 140                                           | 140                     | Bullocks<br>and<br>bulls:<br>425 | Average weight at time of treatment, based<br>on the assumption that younger animals are<br>more likely to have antimicrobial treatment.<br>Weights derived from a committee of<br>European experts, citing (Montforts, 2006).<br>Cited widely in other literature.         |
| UK-VARRS<br>(Veterinary Medicines<br>Directorate & Animal<br>and Plant Health<br>Agency, 2015)                                          | 425            |                                   |                                     | 140                                           |                         |                                  | Average weight at time of treatment. Cites<br>(European Surveillance of Veterinary<br>Antimicrobial Consumption) and (Montforts<br>et al., 1999) (note, this Montforts paper<br>actually gives a weight of 600 kg, we assume<br>the correct citation is (Montforts, 2006)). |

|                                                                       |                  |         |         |        |        |                                                                                                                                                                                                                    |
|-----------------------------------------------------------------------|------------------|---------|---------|--------|--------|--------------------------------------------------------------------------------------------------------------------------------------------------------------------------------------------------------------------|
| (Carmo et al., 2017a, Carmo et al., 2017b)                            | 425              | 200     | 140     |        |        | Assumption for the average weight of dairy cattle in Denmark and Switzerland at the time of treatment for use in AMU metrics. Cite (European Surveillance of Veterinary Antimicrobial Consumption) in both papers. |
| (Livestock Improvement Corporation Limited and DairyNZ Limited, 2015) | 458              |         |         |        |        | Average 'liveweight' for Holstein-Friesians in New Zealand. No reference presented.                                                                                                                                |
| (Bryan and Hea, 2017)                                                 | 458              |         |         |        |        | Assumption for the average weight of dairy cattle in New Zealand for use in AMU metrics. Cite New Zealand Dairy Statistics (Livestock Improvement Corporation Limited and DairyNZ Limited, 2015).                  |
| (Regula et al., 2009)                                                 | 400-500          | 400-500 | 400-500 | 80-100 | 80-100 | Assumption for the average weight of dairy cattle in Switzerland for use in AMU metrics (no reference/data presented).                                                                                             |
| (Grave et al., 2010)                                                  | 500              |         |         |        |        | Considered a 'standard average' for all breeds of dairy cattle across ten European countries for use in AMU metrics (no reference/ data presented).                                                                |
| (Obritzhauser et al., 2016)                                           | 1 LU*<br>(500kg) |         |         |        |        | Assumption for the average weight of dairy cattle in Austria for use in AMU metrics. Cite (OPUL, 2007).                                                                                                            |
| (Montforts et al., 1999)                                              | 600              |         |         |        |        | No reference or data presented for weight values used.                                                                                                                                                             |



|                                                                                     |     |     |     |     |     |               |                                                                                                                                                                                                                     |
|-------------------------------------------------------------------------------------|-----|-----|-----|-----|-----|---------------|---------------------------------------------------------------------------------------------------------------------------------------------------------------------------------------------------------------------|
| (Jensen et al., 2004)                                                               | 600 |     | 300 | 100 | 100 | Bulls:<br>600 | Assumption for the average weight of dairy cattle in Denmark for use in AMU metrics,,where weights were “defined in consultation with [a] group of specialised practitioners”.<br>Cited widely in other literature. |
| (Veterinary Antibiotic Usage and Resistance Surveillance Working Group, 2007, 2009) | 600 |     |     |     |     |               | AMU report for the Netherlands (“Monitoring of Antimicrobial Resistance And Antibiotic Usage in Animals in the Netherlands”). Cite (ASG, 2007)                                                                      |
| (González et al., 2010)                                                             | 600 | 300 | 300 | 100 | 100 |               | Assumption for the average weight of dairy cattle in Switzerland. Cite (Arrigo et al., 1999, Jensen et al., 2004) and Swiss breeding societies.<br>Considered to be average weight at time of treatment.            |
| (Merle et al., 2012)                                                                | 600 | 300 | 300 | 80  | 80  | Bulls:<br>600 | Assumption for the average weight of dairy cattle in Germany for use in AMU metrics<br>Cite (Veterinary Antibiotic Usage and Resistance Surveillance Working Group, 2007)                                           |
| (Saini et al., 2012)                                                                | 600 | 200 | 200 | 200 | 50  |               | Assumption for the average weight of dairy cattle in Canada for use in AMU metrics.<br>Adult weight references (Jensen et al., 2004) (Danish cattle), youngstock weights are not referenced.                        |

|                                |     |     |     |     |     |    |            |                                                                                                                                                                            |
|--------------------------------|-----|-----|-----|-----|-----|----|------------|----------------------------------------------------------------------------------------------------------------------------------------------------------------------------|
| (Pereyra et al., 2015)         | 600 |     |     |     |     | 60 |            | Assumption for the average weight of dairy cattle in Argentina for use in AMU metrics. No reference/data presented.                                                        |
| (Santman-Berends et al., 2015) | 600 |     |     |     |     |    |            | Assumption for the average weight of dairy cattle in the Netherlands for use in AMU metrics as part of a model to predict mastitis incidence. No reference/data presented. |
| (Stevens et al., 2016)         | 600 |     |     |     |     |    |            | Assumption for the average weight of dairy cattle in Belgium for use in AMU metrics. Cite (Jensen et al., 2004)                                                            |
| (Kuipers et al., 2016)         | 600 |     |     |     |     |    |            | Assumption for the average weight of dairy cattle in the Netherlands. No reference/data presented.                                                                         |
| (French Agency for Food, 2013) | 650 | 500 | 350 | 200 | 200 |    | Bulls: 700 | AMU report for France. Weights used are based on 'field experience'.                                                                                                       |
| (Pol and Ruegg, 2007)          | 680 |     |     |     |     |    |            | Assumption for the average weight of dairy cattle in the USA for use in AMU metrics (no reference/ data presented).                                                        |

324 \*livestock unit

325 **Table 2.** Summary data for 20 farms and 2,747 cattle remaining after cleaning for date and  
 326 missing data was performed

| <b>Breakdown of cattle</b>                  |                   | <b>N (%)</b>     |
|---------------------------------------------|-------------------|------------------|
| Total farms                                 |                   | 20               |
| By breed*                                   | Holstein          | 7 (35.0%)        |
|                                             | Friesian          | 2 (10.0%)        |
|                                             | Holstein-Friesian | 8 (40.0%)        |
|                                             | Jersey            | 1 (5.0%)         |
|                                             | Cross-breed       | 1 (5.0%)         |
|                                             | Other             | 1 (5.0%)         |
| Total cattle                                |                   | 2,747            |
| By breed*                                   | Holstein          | 1,099 (40.0%)    |
|                                             | Friesian          | 130 (4.7%)       |
|                                             | Holstein-Friesian | 1,099 (40.0%)    |
|                                             | Jersey            | 170 (6.2%)       |
|                                             | Cross-breed       | 197 (7.2%)       |
|                                             | Other             | 52 (1.9%)        |
| By lactation number                         | 1 (heifers)       | 857 (31.2%)      |
|                                             | 2+ (cows)         | 1,890 (68.8%)    |
| <b>Summary statistics of key properties</b> |                   | <b>Mean (SD)</b> |
| Number of cattle per farm**                 |                   | 137.3 (sd=74.9)  |
| Lactation number                            |                   | 2.7 (1.8)        |
| DIM                                         |                   | 174.3 (116.2)    |
| Production data (litres)***                 |                   | 32.7 (11.2)      |

327 \*Note that breed is assigned at farm level.

328 \*\*Note this is a mean across farms after some cattle were removed due to cleaning, actual  
 329 mean herd size was 155 (cows currently in milk only)

330 \*\*\*Production data was not available for the Jersey cattle

331

332 **Table 3.** Summary of the mean weights of breeds represented and relative representation

333 within the UK dairy herd. Note that breed is assigned at farm level. A t-test was used to

334 compare the mean weights of heifers and cows for each breed, and overall

| Breed             | N (% heifer)  | Overall mean weight, kg (SD) | Heifers mean weight, kg (SD) | Cows mean weight, kg (SD) | p-value |
|-------------------|---------------|------------------------------|------------------------------|---------------------------|---------|
| Holstein          | 1,099 (37.9%) | 636.1 (84.1)                 | 583.9 (73.7)                 | 668.1 (73.5)              | <0.001  |
| Friesian          | 130 (13.9%)   | 629.3 (65.9)                 | 586.7 (82.3)                 | 636.1 (60.6)              | 0.024   |
| Holstein-Friesian | 1,099 (26.9%) | 617.4 (72.8)                 | 590.9 (66.1)                 | 627.1 (72.8)              | <0.001  |
| Jersey            | 170 (22.4%)   | 465.7 (56.0)                 | 407.1 (41.9)                 | 482.6 (47.6)              | <0.001  |
| Cross-breeds*     | 197 (37.6%)   | 623.1 (64.3)                 | 570.7 (47.0)                 | 654.6 (51.4)              | <0.001  |
| Other **          | 52 (26.9%)    | 662.8 (65.8)                 | 618.4 (56.6)                 | 679.1 (61.8)              | 0.003   |
| Excluding Jersey  | 2,577 (31.8%) | 627.3 (77.4)                 | 585.9 (69.1)                 | 646.6 (75.0)              | <0.001  |
| Overall           | 2,747 (31.2%) | 617.3 (85.6)                 | 578.0 (77.4)                 | 635.2 (83.2)              | <0.001  |

335 \*cattle recorded as cross-breed

336 \*\*consisting of different breeds, predominantly dual purpose breeds

337

### 338 Figures

339 *Figure 1: A: Overall distribution of all weights, split into heifers (red) and cows (blue). Mean*  
340 *weights were 578.0 kg for heifers and 635.2 kg for cows, marked with a red triangle and blue*  
341 *square respectively. B: Box plots of the weights of different breeds with heifers (red, left) and*  
342 *cows (blue, right) separated. Heifers were lighter than cows for all breeds ( $p < 0.05$ , Table 3).*  
343 *C: Scatterplot for weight vs. production in litres for all cattle except Jersey cattle (Pearson's*  
344 *correlation coefficient = 0.07). Red line indicates line of best fit. D: As for C but for cattle in*  
345 *peak production period only (Pearson's correlation coefficient = 0.43). E: Trend in weights*  
346 *over the course of lactation for all cattle (black circles, with black lines indicating 95%*  
347 *confidence intervals), heifers (red triangles) and cows (blue squares). Note that confidence*

348 intervals are calculated assuming a normal distribution. Points are filled if there are more  
349 than 10 cattle at that lactation point, otherwise points are unfilled.

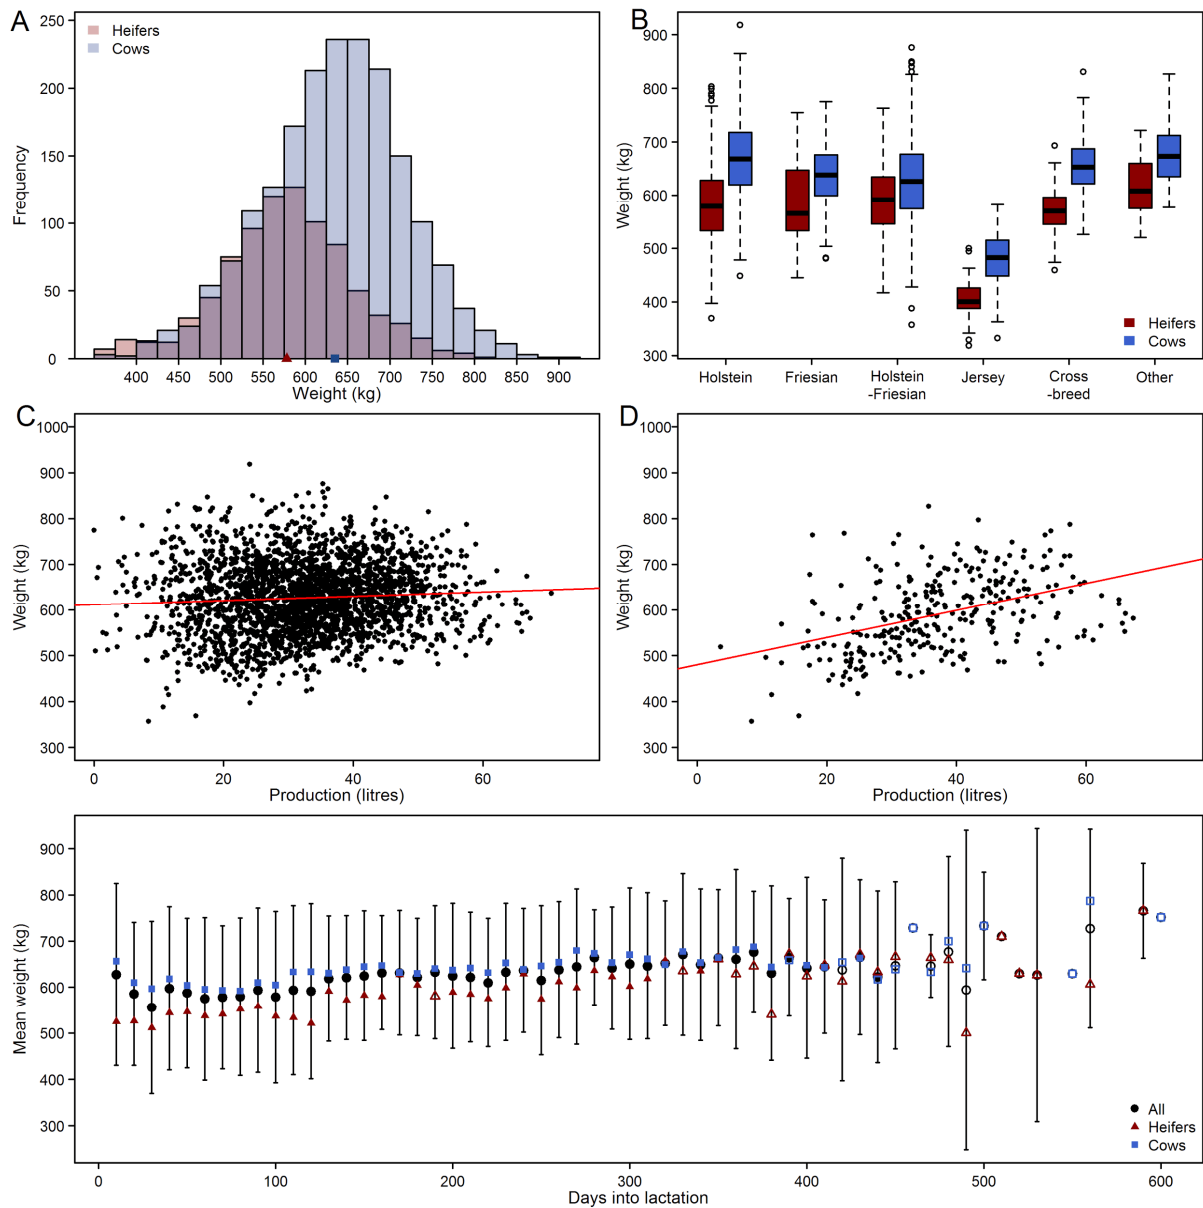

350

351

352

353 *Figure 2: Illustration of the effect different assumed cattle weights can have on the medicine*

354 *dose for Holstein-Friesians (panel A) and effect on the resulting mg/kg metric when*

355 *measuring antimicrobial use in dairy cattle (panel B). In panel A, 525 and 775 kg weights*

356 *were the lowest and highest estimates from practising veterinarians asked to estimate the*

357 *average weight of a UK Holstein-Friesian milking cow, 600 kg was the most common adult*

358 dairy cattle weight reported (Table 1), and 617 kg was the mean weight of Holstein-Friesians  
 359 estimated in this work. In panel B, note that a usage of  $16 \times 10^9$  mg of antimicrobial in the UK  
 360 is intended as an example only. 425 kg was the lowest dairy cattle weight reported in the  
 361 literature (as the “estimated weight at time of treatment” (European Surveillance of  
 362 Veterinary Antimicrobial Consumption)), 600 kg was the most common weight reported  
 363 (Table 1), 620 kg was the UK mean weight estimated in this work and 680 kg was the most  
 364 extreme weight reported in the literature (Table 1, note this weight was from the USA (Pol  
 365 and Ruegg, 2007)).

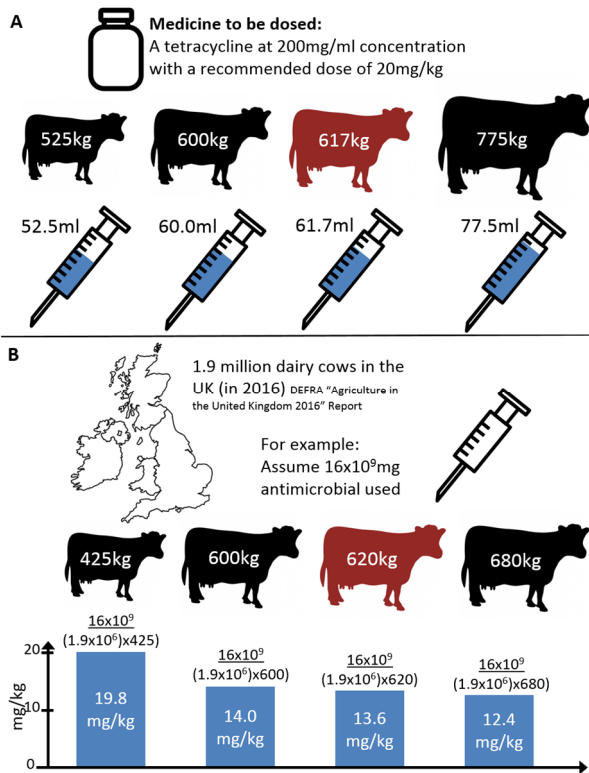

366

367

## 368 References

369 Arrigo, Y., Chaubert, C., Daccord, R., Gagnaux, D., Gerber, H., Guidon, J. D., F., Kessler,  
 370 J., Lehmann, E., Morel, I., Münger, A., Rouel, M., and U. Wyss, Jeangros, B., Lehmann, J.  
 371 1999. Fütterungsempfehlungen und Nährwerttabellen für Wiederkäuer. [Feeding  
 372 recommendations and tables of nutritive values for ruminants]. 4th edition. Federal Research  
 373 Institute for Food Animals, Posieux. Landwirtschaftliche Lehrmittelzentrale. Zollikofen,  
 374 Switzerland.  
 375 ASG. 2007. Kwantitatieve Informatie voor de Veehouderij 2007-2008.

- 376 Bryan, M. and S. Hea. 2017. A survey of antimicrobial use in dairy cows from farms in four  
377 regions of New Zealand. *New Zealand veterinary journal* 65(2):93-98.
- 378 Carmo, L. P., L. R. Nielsen, L. Alban, C. R. Muntener, G. Schupbach-Regula, and I.  
379 Magouras. 2017a. Comparison of Antimicrobial Consumption Patterns in the Swiss and  
380 Danish Cattle and Swine Production (2007-2013). *Frontiers in veterinary science* 4:26.
- 381 Carmo, L. P., G. Schüpbach-Regula, C. Müntener, A. Chevance, G. Moulin, and I.  
382 Magouras. 2017b. Approaches for quantifying antimicrobial consumption per animal species  
383 based on national sales data: a Swiss example, 2006 to 2013. *Eurosurveillance* 22(6).
- 384 Collineau, L., C. Belloc, K. Stärk, A. Hémonic, M. Postma, J. Dewulf, and C. Chauvin. 2017.  
385 Guidance on the selection of appropriate indicators for quantification of antimicrobial usage  
386 in humans and animals. *Zoonoses and public health* 64(3):165-184.
- 387 DairyCo. 2005. Heifer Rearing in the 21st Century. *DairyCo Desktop Review 2005*.
- 388 Dillon, P., S. Snijders, F. Buckley, B. Harris, P. O'Connor, and J. Mee. 2003. A comparison  
389 of different dairy cow breeds on a seasonal grass-based system of milk production: 2.  
390 Reproduction and survival. *Livestock production science* 83(1):35-42.
- 391 Eddy. 1992. Major Metabolic Disorders. *Bovine Medicine*.
- 392 European Surveillance of Veterinary Antimicrobial Consumption. *ESVAC Methodology for*  
393 *Determining Antibiotic Use*.
- 394 French Agency for Food, E. a. O. H. S. A. F. A. f. V. M. P. A., Anne Chevance and Gérard  
395 Moulin,. 2013. Sales survey of Veterinary Medicinal Products containing Antimicrobials in  
396 France - 2013.
- 397 González, S. M., A. Steiner, B. Gassner, and G. Regula. 2010. Antimicrobial use in Swiss  
398 dairy farms: quantification and evaluation of data quality. *Preventive veterinary medicine*  
399 95(1):50-63.
- 400 Grave, K., J. Torren-Edo, and D. Mackay. 2010. Comparison of the sales of veterinary  
401 antibacterial agents between 10 European countries. *Journal of antimicrobial chemotherapy*  
402 65(9):2037-2040.
- 403 Heinrichs, A., H. Erb, G. Rogers, J. Cooper, and C. Jones. 2007. Variability in Holstein heifer  
404 heart-girth measurements and comparison of prediction equations for live weight. *Preventive*  
405 *veterinary medicine* 78(3):333-338.
- 406 Holstein UK. <http://holstein-uk.org/the-holstein-breed>.
- 407 Jensen, V. F., E. Jacobsen, and F. Bager. 2004. Veterinary antimicrobial-usage statistics  
408 based on standardized measures of dosage. *Preventive veterinary medicine* 64(2):201-215.
- 409 Kuipers, A., W. Koops, and H. Wemmenhove. 2016. Antibiotic use in dairy herds in the  
410 Netherlands from 2005 to 2012. *Journal of dairy science* 99(2):1632-1648.
- 411 Lely. [https://www.lely.com/ie/farming-insights/weight-attentions-t4c-helpful-tool-detecting-](https://www.lely.com/ie/farming-insights/weight-attentions-t4c-helpful-tool-detecting-lamen/)  
412 [lamen/](https://www.lely.com/ie/farming-insights/weight-attentions-t4c-helpful-tool-detecting-lamen/)
- 413
- 414 Livestock Improvement Corporation Limited and DairyNZ Limited. 2015. *New Zealand Dairy*  
415 *Statistics 2014-15*.
- 416 Merle, R., P. Hajek, A. Käsbohrer, C. Hegger-Gravenhorst, Y. Mollenhauer, M. Robanus, F.-  
417 R. Ungemach, and L. Kreienbrock. 2012. Monitoring of antibiotic consumption in livestock: a  
418 German feasibility study. *Preventive veterinary medicine* 104(1):34-43.
- 419 Mills, H., A. Turner, L. Morgans, J. Massey, H. Schubert, G. Rees, F. Broadfoot, D. C.  
420 Barrett, A. Dowsey, and K. K. Reyher. 2017. Evaluation of Metrics for Benchmarking  
421 Antimicrobial Use in the United Kingdom Dairy Industry. *Veterinary Record* in press.
- 422 Montforts, M. H. 2006. Validation of the exposure assessment for veterinary medicinal  
423 products. *Science of the total environment* 358(1):121-136.
- 424 Montforts, M. H., D. F. Kalf, P. L. van Vlaardingen, and J. B. Linders. 1999. The exposure  
425 assessment for veterinary medicinal products. *Science of the total environment* 225(1):119-  
426 133.
- 427 Obritzhauser, W., M. Trauffer, J. Raith, I. Kopacka, K. Fuchs, and J. Köfer. 2016.  
428 Antimicrobial drug use on Austrian dairy farms with special consideration of the use of  
429 "highest priority critically important antimicrobials". *Berliner und Münchener Tierärztliche*  
430 *Wochenschrift* 129(5/6):115-195.

- 431 OPUL. 2007. Anhänge zur Sonderrichtlinie des BMLFUW für das Österreichische Programm  
432 zur Förderung einer umweltgerechten, extensiven und den natürlichen Lebensraum  
433 schützenden  
434 Landwirtschaft.
- 435 Pereyra, V. G., M. Pol, F. Pastorino, and A. Herrero. 2015. Quantification of antimicrobial  
436 usage in dairy cows and preweaned calves in Argentina. *Preventive veterinary medicine*  
437 122(3):273-279.
- 438 Podlahová, Š., L. Smutný, and M. Šoch. 2011. Potential Utilization of Automatic Cows  
439 Weighing for Evaluation of Health and Nutritional Condition of Herd. *Scientific Papers Animal*  
440 *Science and Biotechnologies* 44(2):308-314.
- 441 Pol, M. and P. Ruegg. 2007. Treatment practices and quantification of antimicrobial drug  
442 usage in conventional and organic dairy farms in Wisconsin. *Journal of dairy science*  
443 90(1):249-261.
- 444 Poncheki, J. K., M. L. S. Canha, S. L. Viechnieski, and R. d. Almeida. 2015. Analysis of daily  
445 body weight of dairy cows in early lactation and associations with productive and  
446 reproductive performance. *Revista Brasileira de Zootecnia* 44(5):187-192.
- 447 Regula, G., K. Torriani, B. Gassner, F. Stucki, and C. R. Müntener. 2009. Prescription  
448 patterns of antimicrobials in veterinary practices in Switzerland. *Journal of antimicrobial*  
449 *chemotherapy* 63(4):805-811.
- 450 Roberts, J. A., P. Kruger, D. L. Paterson, and J. Lipman. 2008. Antibiotic resistance—what's  
451 dosing got to do with it? *Critical care medicine* 36(8):2433-2440.
- 452 Saini, V., J. T. McClure, D. Léger, S. Dufour, A. Sheldon, D. Scholl, and H. Barkema. 2012.  
453 Antimicrobial use on Canadian dairy farms. *Journal of dairy science* 95(3):1209-1221.
- 454 Santman-Berends, I., T. Lam, J. Keurentjes, and G. Van Schaik. 2015. An estimation of the  
455 clinical mastitis incidence per 100 cows per year based on routinely collected herd data.  
456 *Journal of dairy science* 98(10):6965-6977.
- 457 Sastry, N., C. Thomas, and R. Sing. 1983. Shaeffer's formula for body weight of cattle  
458 described in farm animal management and poultry production. Vikas Publishing House New  
459 Delhi, India.
- 460 Stevens, M., S. Piepers, K. Supré, J. Dewulf, and S. De Vliegher. 2016. Quantification of  
461 antimicrobial consumption in adult cattle on dairy herds in Flanders, Belgium, and  
462 associations with udder health, milk quality, and production performance. *Journal of dairy*  
463 *science* 99(3):2118-2130.
- 464 van der Tol, R. and A. van der Kamp. 2010. Time series analysis of live weight as health  
465 indicator. Pages 230-231 in Proc. Proc. First North Am. Conf. Precision Dairy Management,  
466 Toronto, Canada.
- 467 Veterinary Antibiotic Usage and Resistance Surveillance Working Group. 2007. Monitoring  
468 of Antimicrobial Resistance And Antibiotic Usage in Animals in the Netherlands In  
469 2006/2007.
- 470 Veterinary Antibiotic Usage and Resistance Surveillance Working Group. 2009. MARAN  
471 2009 : Monitoring of antimicrobial resistance and antibiotic usage in animals in the  
472 Netherlands in 2009.
- 473 Veterinary Medicines Directorate & Animal and Plant Health Agency. 2015. UK Veterinary  
474 Antibiotic Resistance and Sales Surveillance.
- 475 Wangchuk, K., J. Wangdi, and M. Mindu. 2017. Comparison and reliability of techniques to  
476 estimate live cattle body weight. *Journal of Applied Animal Research*:1-4.
- 477 Wood, S., K. K. Reyher, and D. C. Barrett. 2015. Comparison of visual assessment and  
478 heart girth tape measurement for estimating the weight of cattle in clinical practice. *The*  
479 *Veterinary Journal* 203(3):337-338.

480

481
